# Supplementary material
Source: HighWire-hosted journal article supplement (https://www.cmaj.ca/highwire/filestream/69678/field_highwire_adjunct_files/0/170289-res-1-at.pdf)
Supplement: 170289-res-1-at.pdf [file 170289-res-1-at.pdf]

**Appendix 1 (as supplied by the author):** Rasch Measurement Theory statistical indicators of fit and Differential Item Functioning results for each scale's items

| SCALES                | ITEM FIT STATISTICS |          |       |          |      |       |     | DIFFERENTIAL ITEM FUNCTIONING |         |     |     |
|-----------------------|---------------------|----------|-------|----------|------|-------|-----|-------------------------------|---------|-----|-----|
|                       | items               | Location | SE    | FitResid | DF   | ChiSq | DF  | Prob                          | Country | Age | Sex |
| <b>CLEFT LIP SCAR</b> |                     |          |       |          |      |       |     |                               |         |     |     |
| <i>colour</i>         | -0.29               | 0.05     | 5.44  | 1142.4   | 10.6 | 9     | 0.3 | -                             | -       | -   |     |
| <i>smile</i>          | -0.16               | 0.05     | -2.34 | 1148.4   | 8.9  | 9     | 0.4 | -                             | -       | -   |     |
| <i>width</i>          | -0.10               | 0.05     | -2.82 | 1144.9   | 6.9  | 9     | 0.7 | -                             | -       | -   |     |
| <i>size</i>           | -0.01               | 0.05     | -2.92 | 1144.9   | 6.9  | 9     | 0.6 | -                             | -       | -   |     |
| <i>photo</i>          | 0.07                | 0.05     | 0.45  | 1141.5   | 0.5  | 9     | 1.0 | -                             | -       | -   |     |
| <i>shape</i>          | 0.19                | 0.05     | -2.23 | 1144.1   | 4.2  | 9     | 0.9 | -                             | -       | -   |     |
| <i>mirror</i>         | 0.29                | 0.05     | -1.62 | 1145.8   | 4.8  | 9     | 0.9 | -                             | -       | -   |     |
| <b>FACE</b>           |                     |          |       |          |      |       |     |                               |         |     |     |
| <i>look best</i>      | -1.07               | 0.04     | -2.36 | 1910.9   | 7.5  | 9     | 0.6 | un/adj                        | -       | -   |     |
| <i>go out</i>         | -0.87               | 0.04     | -1.89 | 1910.9   | 4.9  | 9     | 0.9 | un/adj                        | un      | un  |     |
| <i>shape</i>          | -0.30               | 0.03     | 6.06  | 1899.    | 9.4  | 9     | 0.4 | un/adj                        | un      | -   |     |
| <i>photos</i>         | 0.21                | 0.03     | -0.99 | 1909.1   | 2.1  | 9     | 1.0 | -                             | un      | -   |     |
| <i>match</i>          | 0.22                | 0.03     | 4.07  | 1902.9   | 5.2  | 9     | 0.8 | -                             | -       | -   |     |
| <i>smile</i>          | 0.25                | 0.03     | 0.37  | 1909.1   | 2.5  | 9     | 1.0 | -                             | -       | -   |     |
| <i>laugh</i>          | 0.31                | 0.03     | -3.40 | 1906.5   | 6.3  | 9     | 0.7 | -                             | -       | -   |     |
| <i>profile</i>        | 0.58                | 0.03     | 2.72  | 1897.6   | 3.0  | 9     | 1.0 | un                            | un      | un  |     |
| <i>up close</i>       | 0.66                | 0.03     | -3.03 | 1906.5   | 8.4  | 9     | 0.5 | un                            | un      | un  |     |
| <b>JAWS</b>           |                     |          |       |          |      |       |     |                               |         |     |     |
| <i>size</i>           | -0.17               | 0.06     | -2.64 | 889.6    | 4.5  | 7     | 0.7 | -                             | -       | -   |     |
| <i>shape</i>          | -0.12               | 0.06     | -3.60 | 885.3    | 3.5  | 7     | 0.8 | -                             | -       | -   |     |
| <i>mirror</i>         | -0.11               | 0.06     | -4.20 | 893.0    | 6.6  | 7     | 0.5 | -                             | -       | -   |     |
| <i>photo</i>          | -0.10               | 0.06     | -1.89 | 888.7    | 1.6  | 7     | 1.0 | -                             | -       | -   |     |
| <i>closed</i>         | -0.06               | 0.06     | -1.74 | 890.4    | 2.7  | 7     | 0.9 | -                             | -       | -   |     |
| <i>smile</i>          | 0.07                | 0.06     | -2.44 | 893.0    | 3.4  | 7     | 0.9 | -                             | -       | -   |     |
| <i>profile</i>        | 0.49                | 0.06     | 0.62  | 887.0    | 3.9  | 7     | 0.8 | -                             | -       | -   |     |
| <b>LIPS</b>           |                     |          |       |          |      |       |     |                               |         |     |     |
| <i>smile</i>          | -0.27               | 0.04     | -1.15 | 1602.9   | 3.5  | 9     | 0.9 | -                             | -       | -   |     |
| <i>size</i>           | -0.16               | 0.04     | 1.26  | 1602.9   | 2.6  | 9     | 1.0 | -                             | -       | -   |     |
| <i>photo</i>          | -0.16               | 0.04     | -6.22 | 1600.2   | 7.9  | 9     | 0.5 | -                             | un      | -   |     |
| <i>laugh</i>          | -0.12               | 0.04     | -0.17 | 1599.3   | 2.1  | 9     | 1.0 | -                             | -       | -   |     |
| <i>mirror</i>         | -0.11               | 0.04     | -2.72 | 1609.1   | 4.0  | 9     | 0.9 | -                             | -       | -   |     |
| <i>closed</i>         | 0.01                | 0.04     | 0.67  | 1602.9   | 1.5  | 9     | 1.0 | -                             | -       | -   |     |
| <i>shape</i>          | 0.16                | 0.04     | -4.54 | 1599.3   | 7.3  | 9     | 0.6 | -                             | -       | -   |     |
| <i>full</i>           | 0.26                | 0.04     | 5.01  | 1599.3   | 5.6  | 9     | 0.8 | un/adj                        | -       | -   |     |
| <i>up close</i>       | 0.40                | 0.04     | -0.78 | 1601.1   | 4.2  | 9     | 0.9 | -                             | -       | -   |     |
| <b>NOSE</b>           |                     |          |       |          |      |       |     |                               |         |     |     |
| <i>length</i>         | -0.45               | 0.04     | 0.77  | 1807.2   | 6.1  | 9     | 0.7 | un                            | -       | -   |     |
| <i>smile</i>          | -0.35               | 0.04     | -0.77 | 1801.7   | 5.3  | 9     | 0.8 | un                            | -       | -   |     |
| <i>middle</i>         | -0.26               | 0.04     | -3.07 | 1801.7   | 6.7  | 9     | 0.7 | -                             | -       | -   |     |
| <i>size</i>           | -0.26               | 0.04     | 3.95  | 1795.3   | 8.7  | 9     | 0.5 | un                            | -       | -   |     |
| <i>photo</i>          | -0.11               | 0.04     | -3.09 | 1797.1   | 6.4  | 9     | 0.7 | -                             | un      | -   |     |
| <i>straight</i>       | 0.09                | 0.04     | 2.70  | 1796.2   | 1.4  | 9     | 1.0 | -                             | -       | -   |     |
| <i>width</i>          | 0.11                | 0.04     | 0.59  | 1797.1   | 2.0  | 9     | 1.0 | -                             | -       | -   |     |
| <i>mirror</i>         | 0.17                | 0.04     | -3.40 | 1807.2   | 7.3  | 9     | 0.6 | -                             | -       | -   |     |
| <i>shape</i>          | 0.21                | 0.04     | -1.36 | 1809.9   | 5.2  | 9     | 0.8 | -                             | -       | -   |     |
| <i>tip</i>            | 0.22                | 0.03     | -1.03 | 1802.6   | 3.2  | 9     | 1.0 | -                             | -       | -   |     |

Appendix to: Klassen AF, Wong Riff KWY, Longmire NM et al. Psychometric findings and normative values for the CLEFT-Q based on 2434 children and young adult patients with cleft lip and/or palate from 12 countries. *CMAJ* 2018. doi: 10.1503/cmaj.170289.

|                        |       |      |       |        |      |   |      |        |        |    |
|------------------------|-------|------|-------|--------|------|---|------|--------|--------|----|
| <i>profile</i>         | 0.24  | 0.04 | -2.26 | 1804.5 | 4.1  | 9 | 0.9  | -      | un     | -  |
| <i>match</i>           | 0.38  | 0.03 | 5.14  | 1795.3 | 7.1  | 9 | 0.6  | -      | -      | -  |
| <b>NOSTRILS</b>        |       |      |       |        |      |   |      |        |        |    |
| <i>smile</i>           | -0.21 | 0.04 | -1.00 | 1454.6 | 3.1  | 9 | 1.0  | -      | -      | -  |
| <i>mirror</i>          | -0.11 | 0.04 | -3.47 | 1450.4 | 6.7  | 9 | 0.7  | -      | -      | -  |
| <i>size</i>            | -0.08 | 0.04 | -0.09 | 1447.1 | 3.2  | 9 | 1.0  | -      | -      | -  |
| <i>width</i>           | 0.04  | 0.04 | 1.63  | 1445.5 | 2.3  | 9 | 1.0  | -      | -      | -  |
| <i>photo</i>           | 0.14  | 0.04 | -2.46 | 1455.4 | 6.2  | 9 | 0.7  | -      | -      | -  |
| <i>shape</i>           | 0.22  | 0.04 | -1.79 | 1448.0 | 4.5  | 9 | 0.9  | -      | -      | -  |
| <b>TEETH</b>           |       |      |       |        |      |   |      |        |        |    |
| <i>size</i>            | -0.88 | 0.04 | 3.89  | 1792.4 | 9.2  | 9 | 0.4  | un     | -      | -  |
| <i>close together</i>  | -0.31 | 0.03 | 2.78  | 1784.5 | 5.7  | 9 | 0.8  | -      | un     | -  |
| <i>smile</i>           | -0.11 | 0.03 | -5.67 | 1788.9 | 13.2 | 9 | 0.2  | -      | un     | -  |
| <i>profile</i>         | 0.00  | 0.03 | -4.41 | 1778.4 | 12.9 | 9 | 0.2  | un     | un     | -  |
| <i>straight</i>        | 0.17  | 0.03 | 2.05  | 1786.3 | 2.8  | 9 | 1.0  | -      | un/adj | -  |
| <i>show</i>            | 0.32  | 0.03 | 1.29  | 1788.0 | 2.8  | 9 | 1.0  | -      | un     | -  |
| <i>up close</i>        | 0.39  | 0.03 | -5.73 | 1787.2 | 16.9 | 9 | 0.1  | -      | -      | -  |
| <i>meet</i>            | 0.43  | 0.03 | 3.62  | 1786.3 | 3.6  | 9 | 0.9  | -      | -      | -  |
| <b>PSYCHOLOGICAL</b>   |       |      |       |        |      |   |      |        |        |    |
| <i>happy with life</i> | -0.61 | 0.04 | -0.71 | 1644.1 | 4.5  | 9 | 0.9  | -      | -      | -  |
| <i>enjoy life</i>      | -0.54 | 0.04 | -2.61 | 1636.9 | 6.6  | 9 | 0.7  | un     | -      | un |
| <i>feel happy</i>      | -0.27 | 0.04 | -0.01 | 1638.7 | 3.3  | 9 | 1.0  | -      | -      | -  |
| <i>feel okay</i>       | -0.15 | 0.04 | 0.03  | 1636.9 | 5.0  | 9 | 0.8  | -      | -      | -  |
| <i>believe in self</i> | -0.13 | 0.04 | 1.71  | 1635.1 | 6.4  | 9 | 0.7  | -      | -      | -  |
| <i>proud of self</i>   | -0.07 | 0.04 | -2.50 | 1638.7 | 6.3  | 9 | 0.7  | un     | un     | -  |
| <i>like self</i>       | 0.16  | 0.04 | -4.41 | 1632.4 | 8.6  | 9 | 0.5  | un/adj | -      | -  |
| <i>feel confident</i>  | 0.35  | 0.04 | 5.27  | 1633.3 | 8.6  | 9 | 0.5  | -      | -      | -  |
| <i>feel great</i>      | 0.35  | 0.04 | -4.03 | 1637.8 | 9.9  | 9 | 0.4  | un/adj | un     | un |
| <i>good look</i>       | 0.91  | 0.04 | 2.87  | 1636.0 | 3.6  | 9 | 0.9  | -      | un     | -  |
| <b>SCHOOL</b>          |       |      |       |        |      |   |      |        |        |    |
| <i>seeing friends</i>  | -0.91 | 0.06 | 0.95  | 1100.3 | 5.4  | 9 | 0.8  | -      | un     | -  |
| <i>teachers</i>        | -0.54 | 0.05 | 3.89  | 1161.3 | 13.8 | 9 | 0.1  | un     | -      | un |
| <i>accepted</i>        | -0.17 | 0.05 | -4.41 | 1159.5 | 16.6 | 9 | 0.1  | -      | -      | -  |
| <i>liked</i>           | -0.16 | 0.05 | -3.08 | 1155.0 | 16.9 | 9 | 0.1  | -      | -      | -  |
| <i>happy</i>           | -0.03 | 0.05 | -0.60 | 1159.5 | 6.0  | 9 | 0.7  | -      | un/adj | -  |
| <i>nice to me</i>      | -0.01 | 0.05 | -3.93 | 1157.7 | 17.3 | 9 | 0.04 | -      | un/adj | -  |
| <i>listen to me</i>    | 0.16  | 0.05 | -0.78 | 1160.4 | 5.7  | 9 | 0.8  | -      | un     | -  |
| <i>safe</i>            | 0.16  | 0.04 | 0.95  | 1158.6 | 4.5  | 9 | 0.9  | -      | un     | -  |
| <i>make friends</i>    | 0.75  | 0.04 | 1.98  | 1153.2 | 5.1  | 9 | 0.8  | -      | -      | un |
| <i>join activities</i> | 0.77  | 0.04 | 3.12  | 1157.7 | 6.8  | 9 | 0.7  | -      | -      | -  |
| <b>SOCIAL</b>          |       |      |       |        |      |   |      |        |        |    |
| <i>friends accept</i>  | -1.33 | 0.05 | -1.55 | 1670.9 | 5.5  | 9 | 0.8  | un     | un     | un |
| <i>fun friends</i>     | -0.94 | 0.04 | 0.70  | 1672.7 | 2.4  | 9 | 1.0  | un/adj | -      | -  |
| <i>people listen</i>   | -0.34 | 0.04 | -0.37 | 1669.1 | 3.9  | 8 | 0.9  | un     | un     | -  |
| <i>treat same</i>      | -0.21 | 0.04 | -3.76 | 1670.9 | 11.0 | 8 | 0.2  | un/adj | un/adj | -  |
| <i>like being with</i> | -0.12 | 0.04 | -0.67 | 1672.7 | 3.8  | 8 | 0.9  | un/adj | -      | un |
| <i>confident out</i>   | 0.37  | 0.04 | -3.18 | 1666.4 | 10.9 | 8 | 0.2  | un     | un     | -  |
| <i>fit in</i>          | 0.48  | 0.03 | 0.14  | 1672.7 | 2.8  | 8 | 1.0  | un     | -      | un |
| <i>make friends</i>    | 0.56  | 0.03 | -1.03 | 1670.9 | 4.3  | 8 | 0.8  | -      | -      | -  |
| <i>same others</i>     | 0.76  | 0.03 | 2.81  | 1676.3 | 3.1  | 8 | 0.9  | -      | -      | -  |
| <i>people look</i>     | 0.78  | 0.03 | 5.14  | 1674.5 | 7.9  | 8 | 0.4  | -      | -      | -  |
| <b>SPEECH DISTRESS</b> |       |      |       |        |      |   |      |        |        |    |
| <i>go out</i>          | -1.25 | 0.07 | -0.57 | 813.9  | 9.2  | 9 | 0.4  | n/a    | -      | -  |

Appendix to: Klassen AF, Wong Riff KKY, Longmire NM et al. Psychometric findings and normative values for the CLEFT-Q based on 2434 children and young adult patients with cleft lip and/or palate from 12 countries. *CMAJ* 2018. doi: 10.1503/cmaj.170289.

|                        |       |      |       |       |      |   |     |     |   |   |
|------------------------|-------|------|-------|-------|------|---|-----|-----|---|---|
| <i>make friends</i>    | -0.98 | 0.07 | -0.72 | 813.9 | 7.1  | 9 | 0.6 | n/a | - | - |
| <i>teased</i>          | -0.70 | 0.07 | 2.10  | 813.9 | 13.3 | 9 | 0.2 | n/a | - | - |
| <i>frustrated</i>      | -0.38 | 0.07 | -3.42 | 814.8 | 13.3 | 9 | 0.2 | n/a | - | - |
| <i>embarrassed</i>     | -0.35 | 0.07 | -3.61 | 816.6 | 11.3 | 9 | 0.3 | n/a | - | - |
| <i>avoid</i>           | 0.28  | 0.06 | 2.01  | 816.6 | 9.1  | 9 | 0.4 | n/a | - | - |
| <i>nervous</i>         | 0.44  | 0.06 | -1.80 | 814.8 | 7.7  | 9 | 0.6 | n/a | - | - |
| <i>worry</i>           | 0.71  | 0.06 | -1.19 | 816.6 | 6.7  | 9 | 0.7 | n/a | - | - |
| <i>repeat</i>          | 1.07  | 0.06 | 0.38  | 813.0 | 3.8  | 9 | 0.9 | n/a | - | - |
| <i>understood</i>      | 1.16  | 0.07 | 1.51  | 813.0 | 7.1  | 9 | 0.6 | n/a | - | - |
| <b>SPEECH FUNCTION</b> |       |      |       |       |      |   |     |     |   |   |
| <i>family</i>          | -1.36 | 0.07 | 0.23  | 814.9 | 15.0 | 9 | 0.1 | n/a | - | - |
| <i>friends</i>         | -1.11 | 0.07 | -1.93 | 812.1 | 13.9 | 9 | 0.1 | n/a | - | - |
| <i>read aloud</i>      | -0.15 | 0.06 | 3.90  | 816.7 | 16.8 | 9 | 0.1 | n/a | - | - |
| <i>some sentences</i>  | -0.14 | 0.07 | -3.38 | 812.1 | 5.7  | 9 | 0.8 | n/a | - | - |
| <i>avoid</i>           | -0.12 | 0.06 | 3.35  | 814.9 | 12.8 | 9 | 0.2 | n/a | - | - |
| <i>phone</i>           | 0.04  | 0.07 | -3.54 | 807.6 | 5.7  | 9 | 0.8 | n/a | - | - |
| <i>new people</i>      | 0.10  | 0.07 | -3.47 | 813.1 | 12.1 | 9 | 0.2 | n/a | - | - |
| <i>try hard</i>        | 0.37  | 0.07 | -3.94 | 813.1 | 10.0 | 9 | 0.4 | n/a | - | - |
| <i>repeat</i>          | 0.41  | 0.08 | -3.11 | 812.1 | 7.2  | 9 | 0.6 | n/a | - | - |
| <i>speak slow</i>      | 0.42  | 0.07 | -3.37 | 813.1 | 6.8  | 9 | 0.7 | n/a | - | - |
| <i>concentrate</i>     | 0.73  | 0.06 | 0.17  | 816.7 | 7.8  | 9 | 0.6 | n/a | - | - |
| <i>some words</i>      | 0.81  | 0.07 | -1.48 | 817.6 | 4.8  | 9 | 0.9 | n/a | - | - |

**Abbreviations:** SE- Standard Error; DF – Degrees of freedom; Prob – Probability; un – Unadjusted Differential Item Functioning analysis; adj – Adjusted Differential Item Functioning analysis; n/a – Not applicable. **Note:** For country analysis Differential Item Functioning was not computed for speech function and speech distress.
